# Supplementary material for: Integration of Micro-Nano-Engineered Hydroxyapatite/Biochars with Optimized Sorption for Heavy Metals and Pharmaceuticals
Source: MDPI journal article supplement (doi:10.3390/nano12121988), 2022-06-09
Supplement: s1 [file s1]

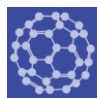

# Integration of Micro-Nano-Engineered Hydroxyapatite/Biochars with Optimized Sorption for Heavy Metals and Pharmaceuticals

Xin Zhao <sup>1</sup>, Peiling Yuan <sup>2,\*</sup>, Ziyan Yang <sup>3,4</sup>, Wei Peng <sup>5</sup>, Xiang Meng <sup>6</sup> and Jiang Cheng <sup>6</sup>

<sup>1</sup> Graduate Department, Civil Aviation Flight University of China, Guanghan 618307, China; zhaox@cafuc.edu.cn

<sup>2</sup> College of Science, Zhengzhou Key Laboratory of Low-dimensional Quantum Materials and Devices, Zhongyuan University of Technology, Zhengzhou 450007, China

<sup>3</sup> School of Environmental and Municipal Engineering, North China University of Water Resources and Electric Power, Zhengzhou 450045, China; yangziyan@ncwu.edu.cn

<sup>4</sup> Henan Province Key Laboratory of Water Pollution Control and Rehabilitation Technology, Henan University of Urban Construction, Pingdingshan 467036, China

<sup>5</sup> Department of Ecology and Environment of Henan Province, Zhengzhou 450046, China; weipeng\_henan@outlook.com

<sup>6</sup> Chongqing Key Laboratory of Materials Surface & Interface Science, Chongqing University of Arts and Sciences, Chongqing 402160, China; xmeng@cqwu.edu.cn (X.M.); cheng20120027@hotmail.com (J.C.)

\* Correspondence: yuan.peiling.18@zut.edu.cn

## 1. Batch Experiments

### 1.1. Sorption of Heavy Metals

The stock solutions (500.0 mg/L) of Pb(II), Cu(II), and Cd(II) were prepared by dissolving Pb(NO<sub>3</sub>)<sub>2</sub>, Cu(NO<sub>3</sub>)<sub>2</sub>, and Cd(NO<sub>3</sub>)<sub>2</sub> in DI water, respectively. All the batch sorption experiments were performed in conical flasks located on an oscillating box at a frequency of 200 rpm for 24 h. The stock suspension of HBCs, heavy metals, and NaNO<sub>3</sub> solution were mixed to achieve the desired concentrations of each component. Specifically, the effects of geochemical conditions, including contact time (0.0–1440.0 min), pH value (2.0–7.0), ionic strength (0.01–0.20 mol/L), coexisting HA molecule (0–30 mg/L), and temperature (293–313 K), were studied, respectively. After being shaken for 24 h (enough to achieve the sorption equilibrium in this study), the solid/liquid phases in suspensions were separated by centrifuging at 14,000 rpm for 10 min, and the obtained supernatants were filtrated with a 0.22 μm filter membrane. The concentrations of Pb(II), Cu(II), and Cd(II) were determined by flame atomic absorption spectrometry (AA-6880, Shimadzu, Kyoto, Japan). The sorption capacity ( $q_e$ , mg/g) of heavy metals was calculated from the initial ( $C_0$ , mg/L) and final equilibrium concentration ( $C_e$ , mg/L) as  $q_e = (C_0 - C_e)/(m/V)$ , where  $m/V$  (g/L) was the dosage of sorbents. All experimental data were the averages of triplicate determinations, and the relative errors of the data were less than 5.0%.

The compositions of simulated wastewater referred to previous reports as follows: 4.0 mg/L of Ca(NO<sub>3</sub>)<sub>2</sub>·2H<sub>2</sub>O, 7.0 mg/L of NaNO<sub>3</sub>, 180.0 mg/L of NH<sub>4</sub>NO<sub>3</sub>, 40.0 mg/L of K<sub>2</sub>HPO<sub>4</sub>·3H<sub>2</sub>O, 205.0 mg/L of CH<sub>3</sub>COONa, 3.4 mg/L of MgCl<sub>2</sub>·6H<sub>2</sub>O, and 110.0 mg/L of C<sub>6</sub>H<sub>5</sub>COONa. Cu(NO<sub>3</sub>)<sub>2</sub>, Cd(NO<sub>3</sub>)<sub>2</sub>, and Pb(NO<sub>3</sub>)<sub>2</sub> were added to the artificial wastewater with an initial concentration of 60.0 mg/L for each heavy metal. The solution pH was adjusted to 2.0 and 4.0, respectively. A total of 0.05 g of HBCs was mixed with 100.0 mL of artificial wastewater at 293 K with an oscillation of 24 h. Then, the suspension was centrifuged and filtered through the nylon membranes with a pore size of 0.22 μm. The concentrations of Cu(II), Cd(II), and Pb(II) were determined by flame atomic absorption spectroscopy.

### 1.2. Sorption of Pharmaceuticals

The sorption kinetics of CBZ and TC on HBCs were studied by adding HBCs (500.0 mg) into pharmaceutical solutions (100.0 mg/L of CBZ and TC separately, 1000.0 mL) with constant stirring at 293 K. The investigation of sorption isotherms of CBZ and tetracycline were carried out in conical flasks with  $C_0$  from 10 to 100 mg/L. The effects of geochemical conditions, including contact time (0.0–1440.0 min), pH value (2.0–8.0), ionic strength (0.01–0.20 mol/L), and temperature (293–313 K), were studied. The suspensions with given time intervals were centrifuged and filtered through a 0.22 mm nylon membrane. The concentrations of CBZ and TC in supernatants were measured by a UV spectrophotometer (Shimadzu 2600) at the maximum absorbance wavelength of 284 and 276 nm, respectively.

### 1.3. Regeneration Studies

The regenerations of HBCs after the adsorption of Cu(II), Cd(II), Pb(II), CBZ, and TC were carried out using 0.1 mol/L of  $\text{KH}_2\text{PO}_4$  solution and trichloromethane, respectively. After agitation at 100 rpm for 24 h at T 298 K, HBCs were gathered by centrifugation, then were thoroughly washed three times using DI water and dried at T 333 K overnight.

## 2. Data Analysis

The kinetic data were fitted by the pseudo-first-order model ( $\ln(q_e - q_t) = \ln q_e - k_1 t$ ) and pseudo-second-order model ( $t/q_t = 1/(k_2 q_e^2) + t/q_e$ ), where  $q_t$  (mg/g) was the sorption capacity at time  $t$  (min), and  $k_1$  (L/min) and  $k_2$  (g/(mg min)) were the sorption rate constants. Sorption isotherms were analyzed by the Langmuir model ( $q_e = q_{\max} K_L C_e / (1 + K_L C_e)$ ) and Freundlich model ( $q_e = K_F C_e^{1/n}$ ), where  $K_L$  (L/mg) was the Langmuir sorption coefficient,  $q_{\max}$  (mg/g) was the maximum sorption capacity, and  $K_F$  ( $\text{mg}^{1-n} \text{L}^n/\text{g}$ ) and  $n$  were the sorption and nonlinear coefficients for the Freundlich model, respectively. The thermodynamic parameters, including the standard Gibbs free energy change ( $\Delta G^\circ$ ), enthalpy change ( $\Delta H^\circ$ ), and entropy change ( $\Delta S^\circ$ ), were calculated from  $K_d = (C_0 - C_e)V/C_e m$ ,  $\Delta G^\circ = -RT \ln K^\circ$ ,  $\ln K^\circ = \Delta S^\circ/R - \Delta H^\circ/(RT)$ , and  $\Delta G^\circ = \Delta H^\circ - T\Delta S^\circ$ , where  $K_d$  was the equilibrium constant,  $T$  was the absolute temperature (K), and  $R$  was the universal gas constant 8.314 J/(mol K).  $K^\circ$  was the temperature-dependent equilibrium constant of sorption and could be obtained from the intercept of  $\ln K_d$  as a function of  $C_e$ .

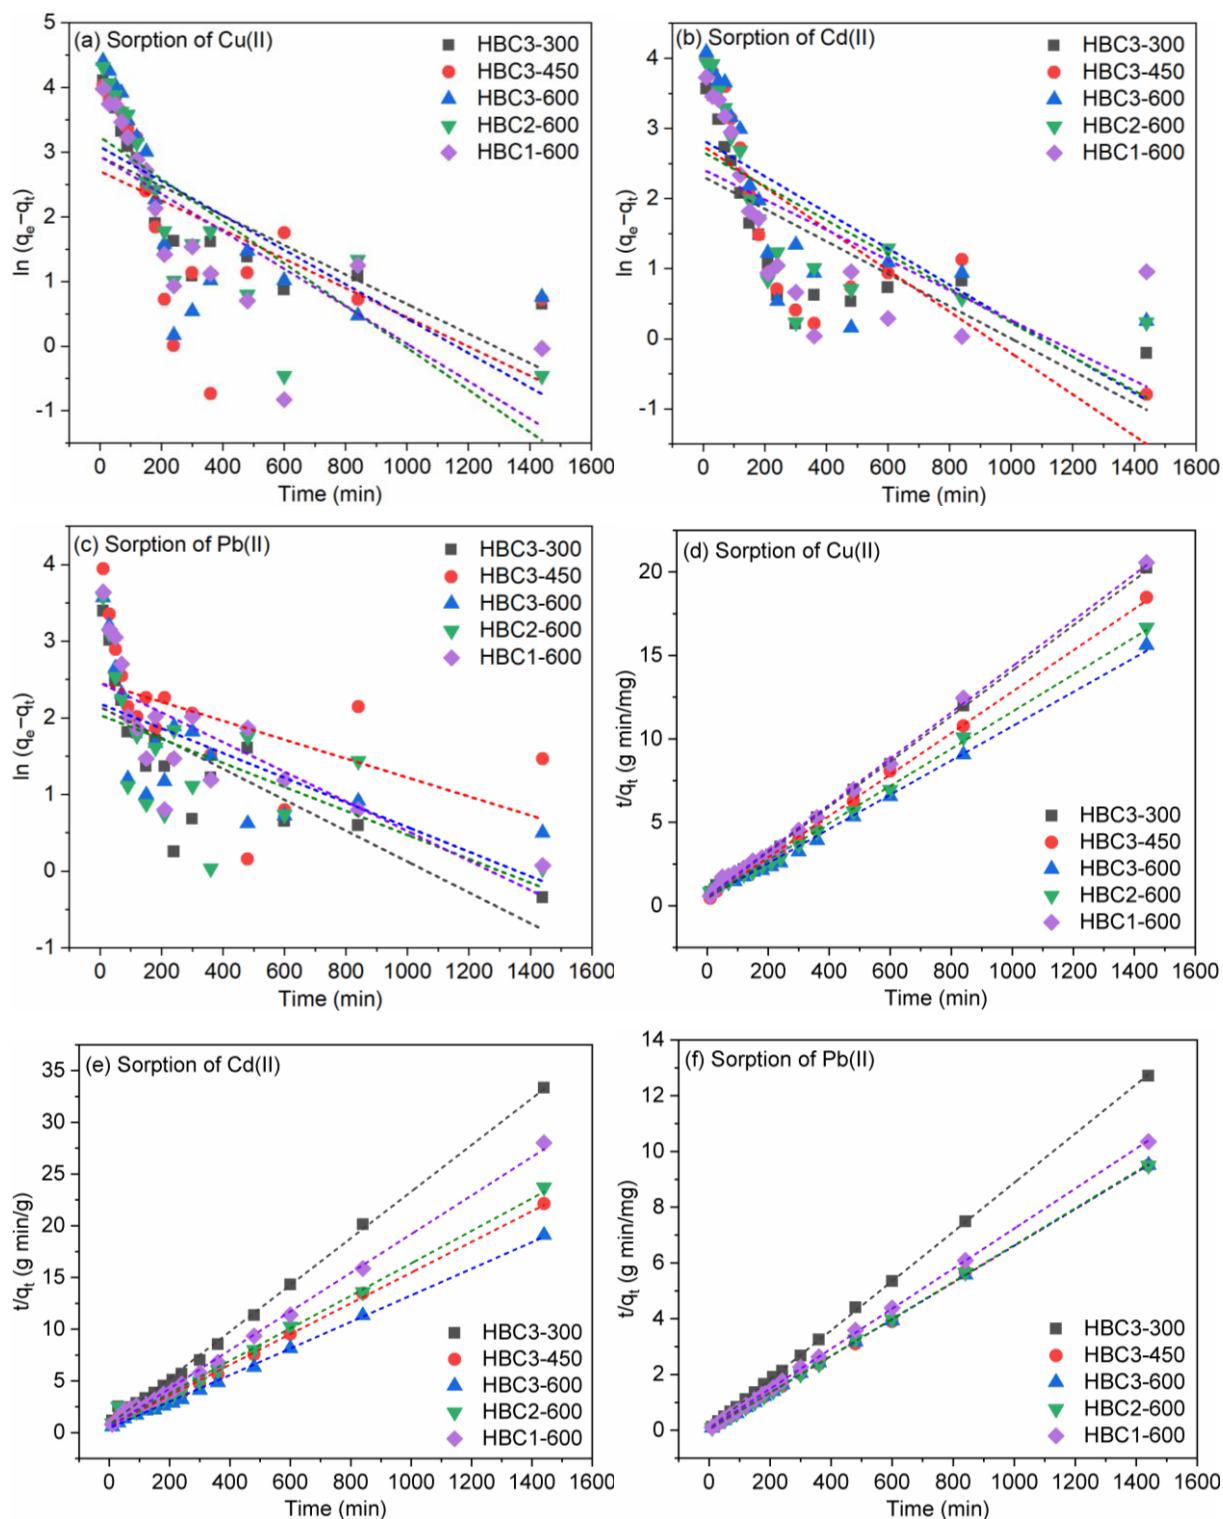

**Figure S1.** The pseudo-first-order and pseudo-second-order kinetic fittings for the sorption of Cu(II) (a,d), Cd(II) (b,e), and Pb(II) (c,f) on HBCs.  $C_{\text{Cu(II)initial}} = C_{\text{Cd(II)initial}} = C_{\text{Pb(II)initial}} = 60.0 \text{ mg/L}$ ,  $\text{pH} = 5.0 \pm 0.1$ ,  $T = 293 \text{ K}$ ,  $m/V = 0.5 \text{ g/L}$ ,  $I = 0.01 \text{ mol/L NaNO}_3$ .

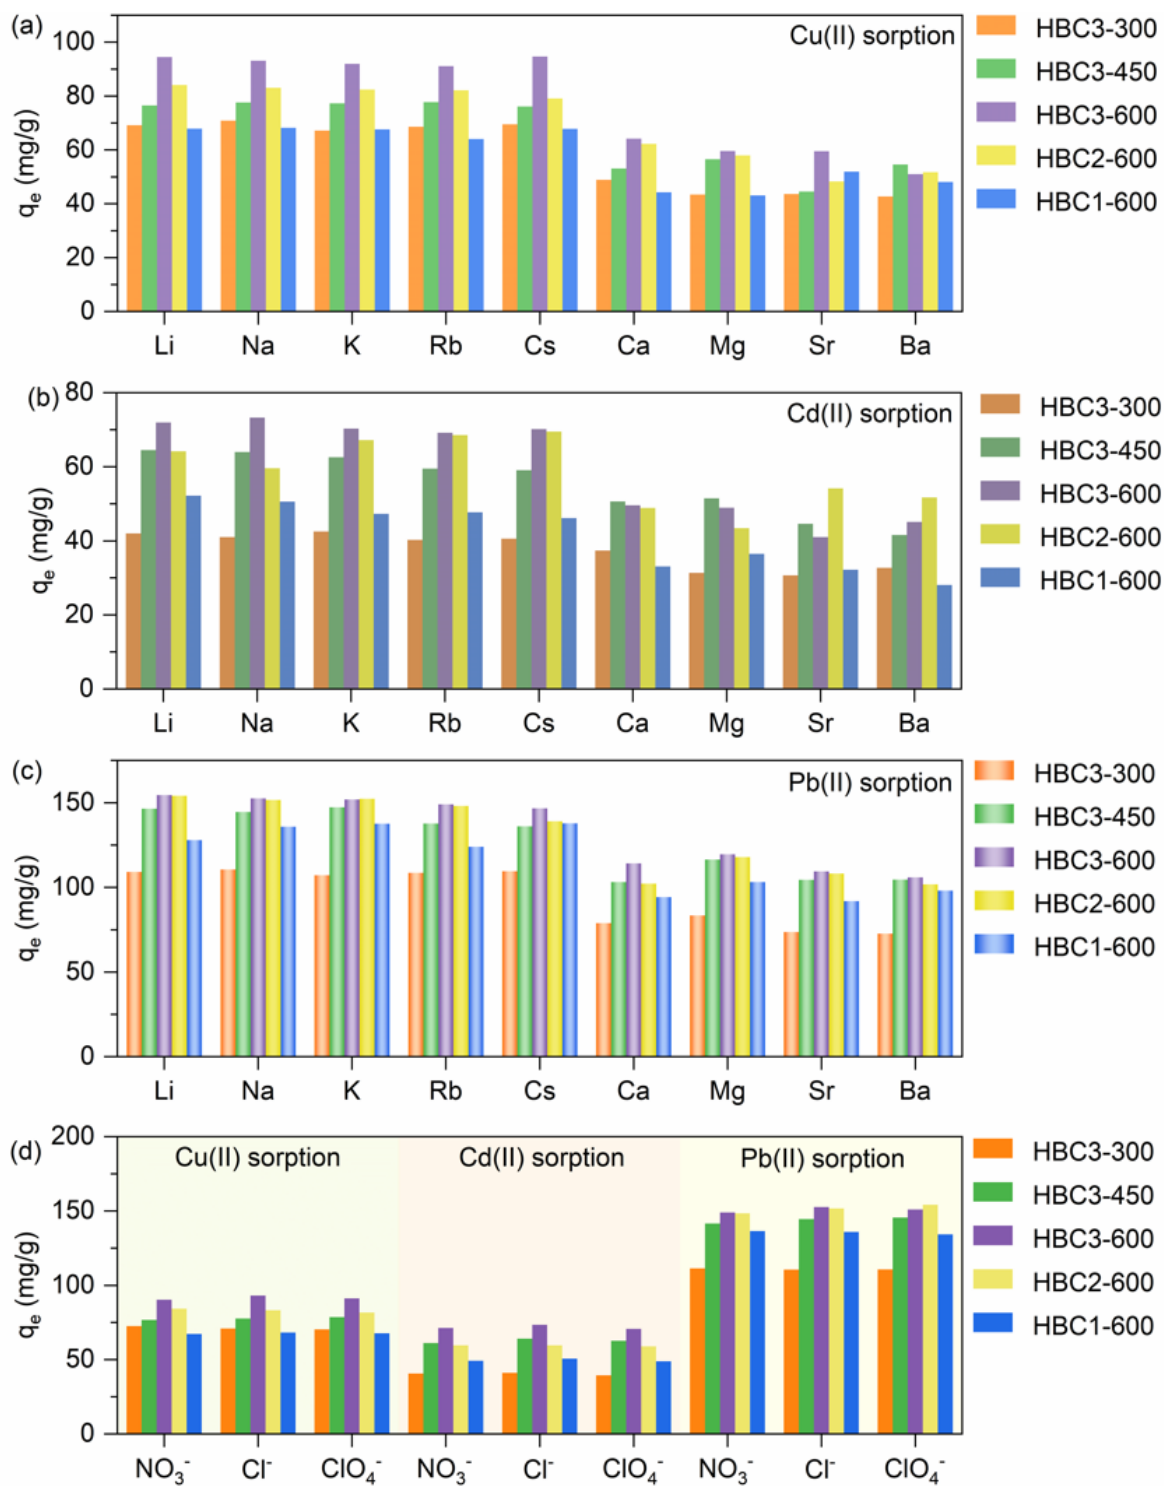

**Figure S2.** The interference of cations on the adsorption of Cu(II) (a), Cd(II) (b), and Pb(II) (c) on HBCs. The interference of anions (d) on the adsorption of Cu(II), Cd(II), and Pb(II) on HBCs.  $C_{[\text{background X ions}]} = 0.01 \text{ mol/L}$  ( $X = \text{Mg}^{2+}, \text{Li}^+, \text{Rb}^+, \text{Cs}^+, \text{Na}^+, \text{K}^+, \text{Ca}^{2+}, \text{Sr}^{2+}, \text{Ba}^{2+}$ ), and  $C_{[\text{background anion}]} = 0.01 \text{ mol/L}$ .  $C_{[\text{Cu(II)}]_{\text{initial}}} = C_{[\text{Cd(II)}]_{\text{initial}}} = C_{[\text{Pb(II)}]_{\text{initial}}} = 60.0 \text{ mg/L}$ ,  $\text{pH} = 5.0 \pm 0.1$ ,  $T = 293 \text{ K}$ ,  $m/V = 0.4 \text{ g/L}$ .

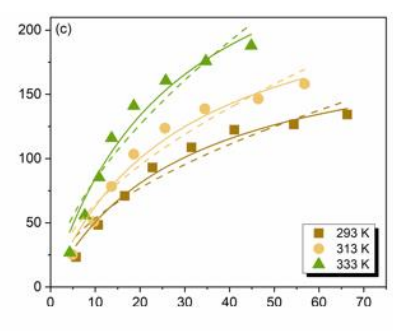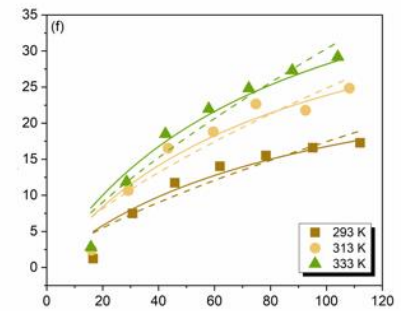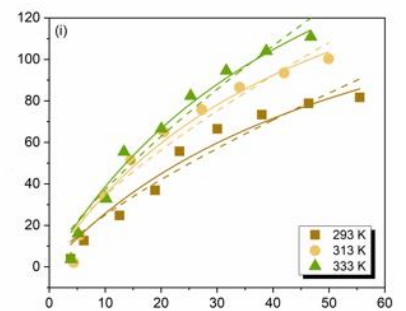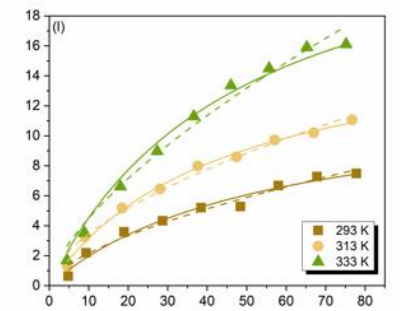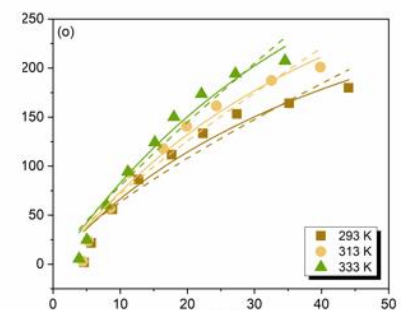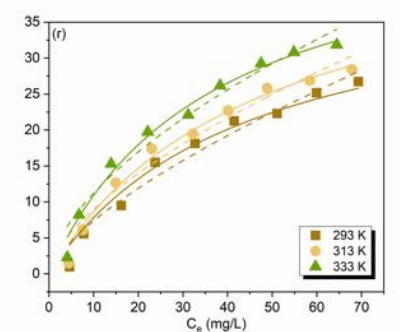



**Figure S3.** Sorption isotherms of Cu(II), Cd(II), and Pb(II) on HBC1-600 (a,g,m), HBC2-600 (b,h,n), HBC3-600 (c,i,o), HBC3-450 (d,j,p), HBC3-300 (e,k,q), and HAP (f,l,r). The solid and dashed lines are the fittings by Langmuir and Freundlich models, respectively. pH = 5.0 ± 0.1, T = 293 K, m/V = 0.50 g/L, I = 0.01 mol/L NaNO<sub>3</sub>.

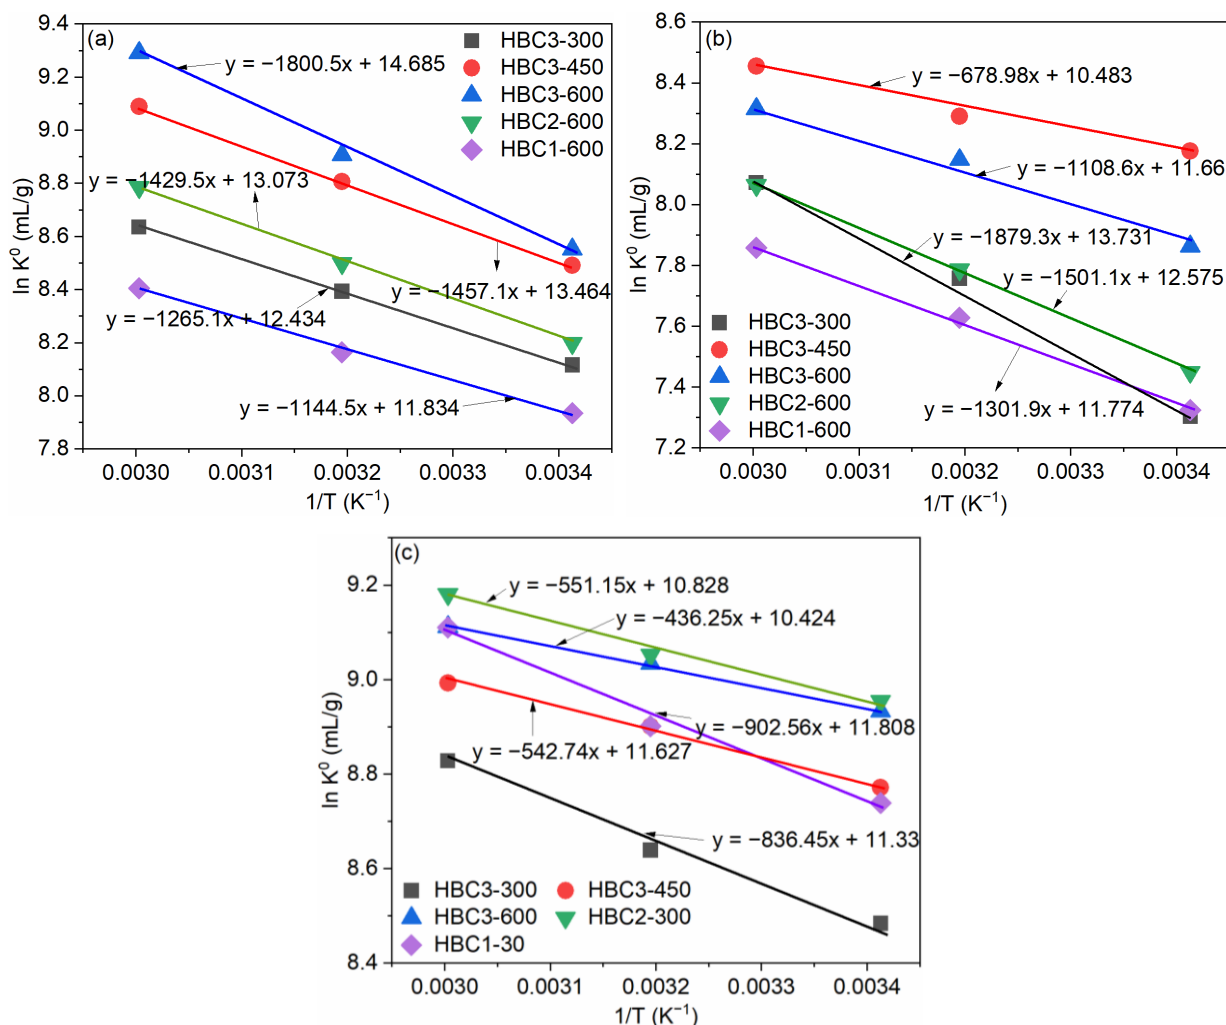

**Figure S4.** Linear plots of  $\ln K^0$  versus  $1/T$  for Cu(II) (a), Cd(II) (b), and Pb(II) (c) adsorbed on HBCs.  $C_{[Cu(II)]initial} = C_{[Cd(II)]initial} = C_{[Pb(II)]initial} = 60.0$  mg/L, pH = 5.0 ± 0.1, T = 293 K, m/V = 0.5 g/L, I = 0.01 mol/L NaNO<sub>3</sub>.

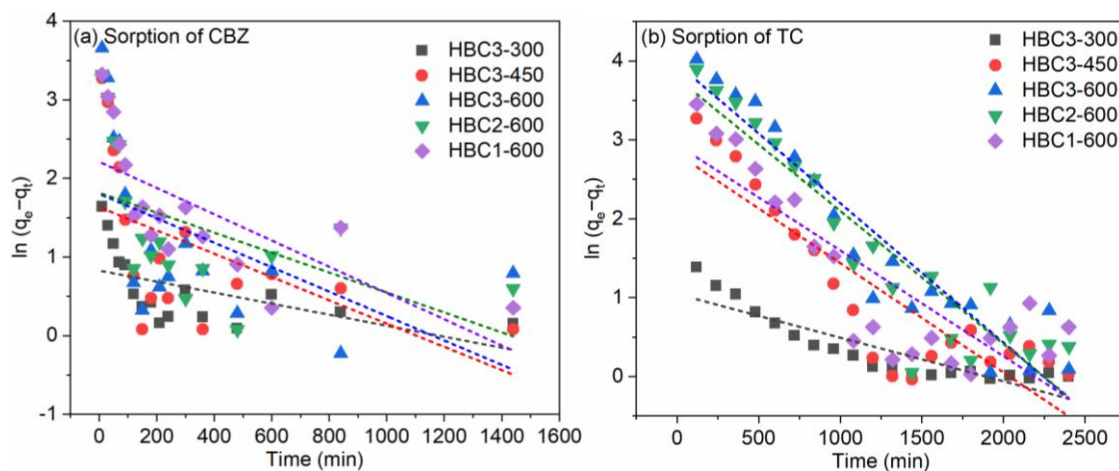

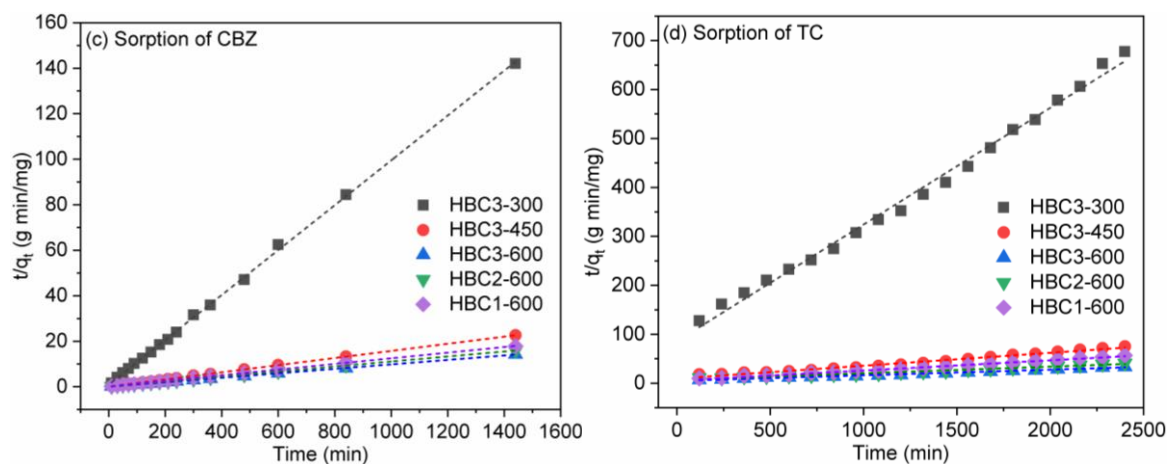

**Figure S5.** The pseudo-first-order and pseudo-second-order kinetic fittings for the sorption of CBZ (a,c) and TC (b,d) on HBCs.  $C_{[CBZ]initial} = C_{[TC]initial} = 60.0$  mg/L,  $pH = 6.0 \pm 0.1$ ,  $T = 293$  K,  $m/V = 0.5$  g/L,  $I = 0.01$  mol/L  $NaNO_3$ .

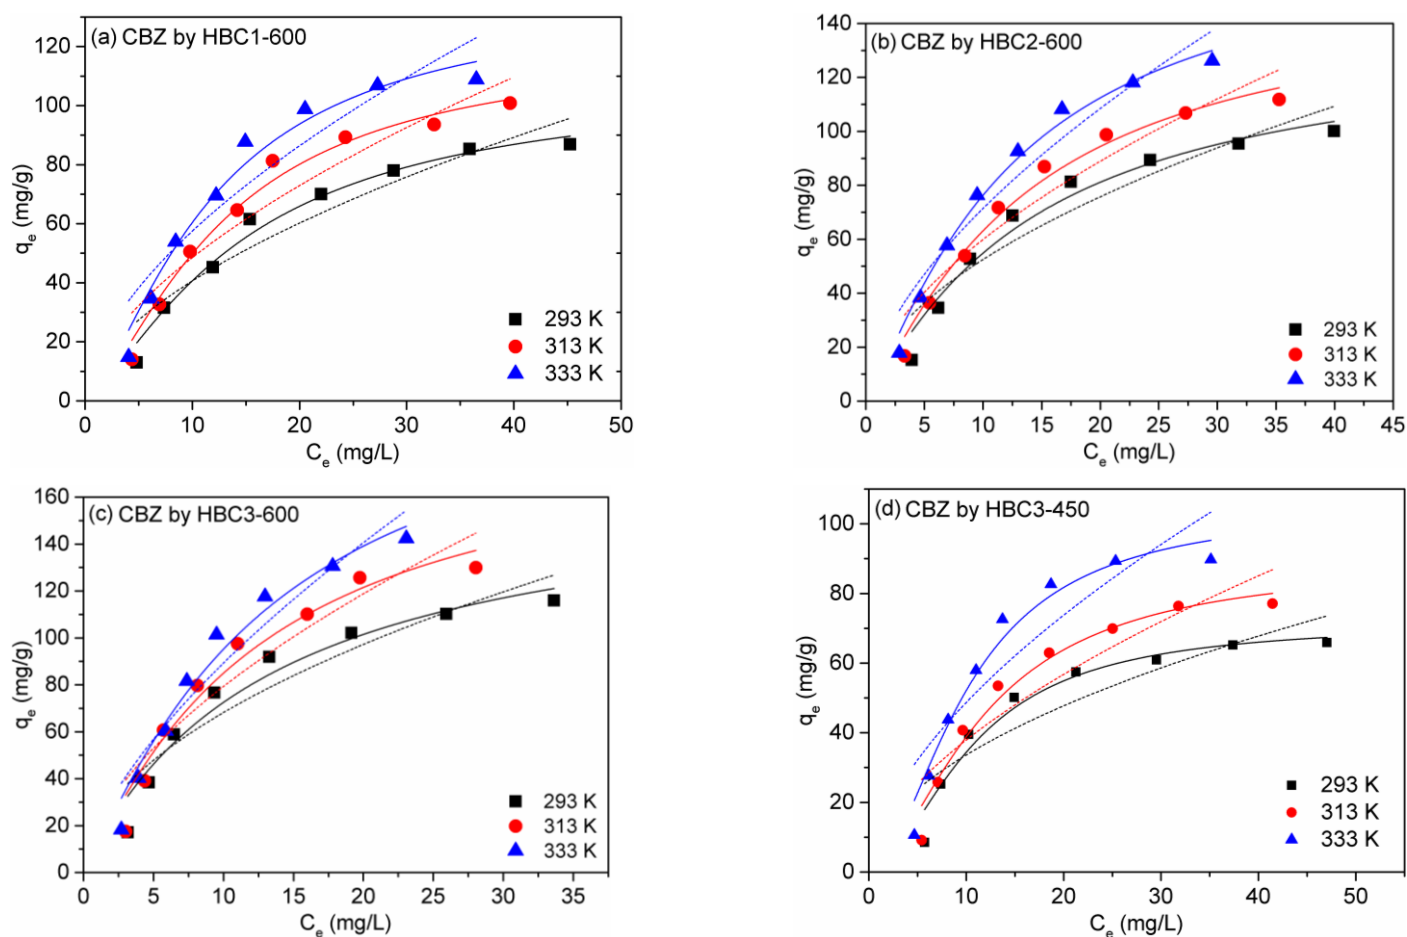

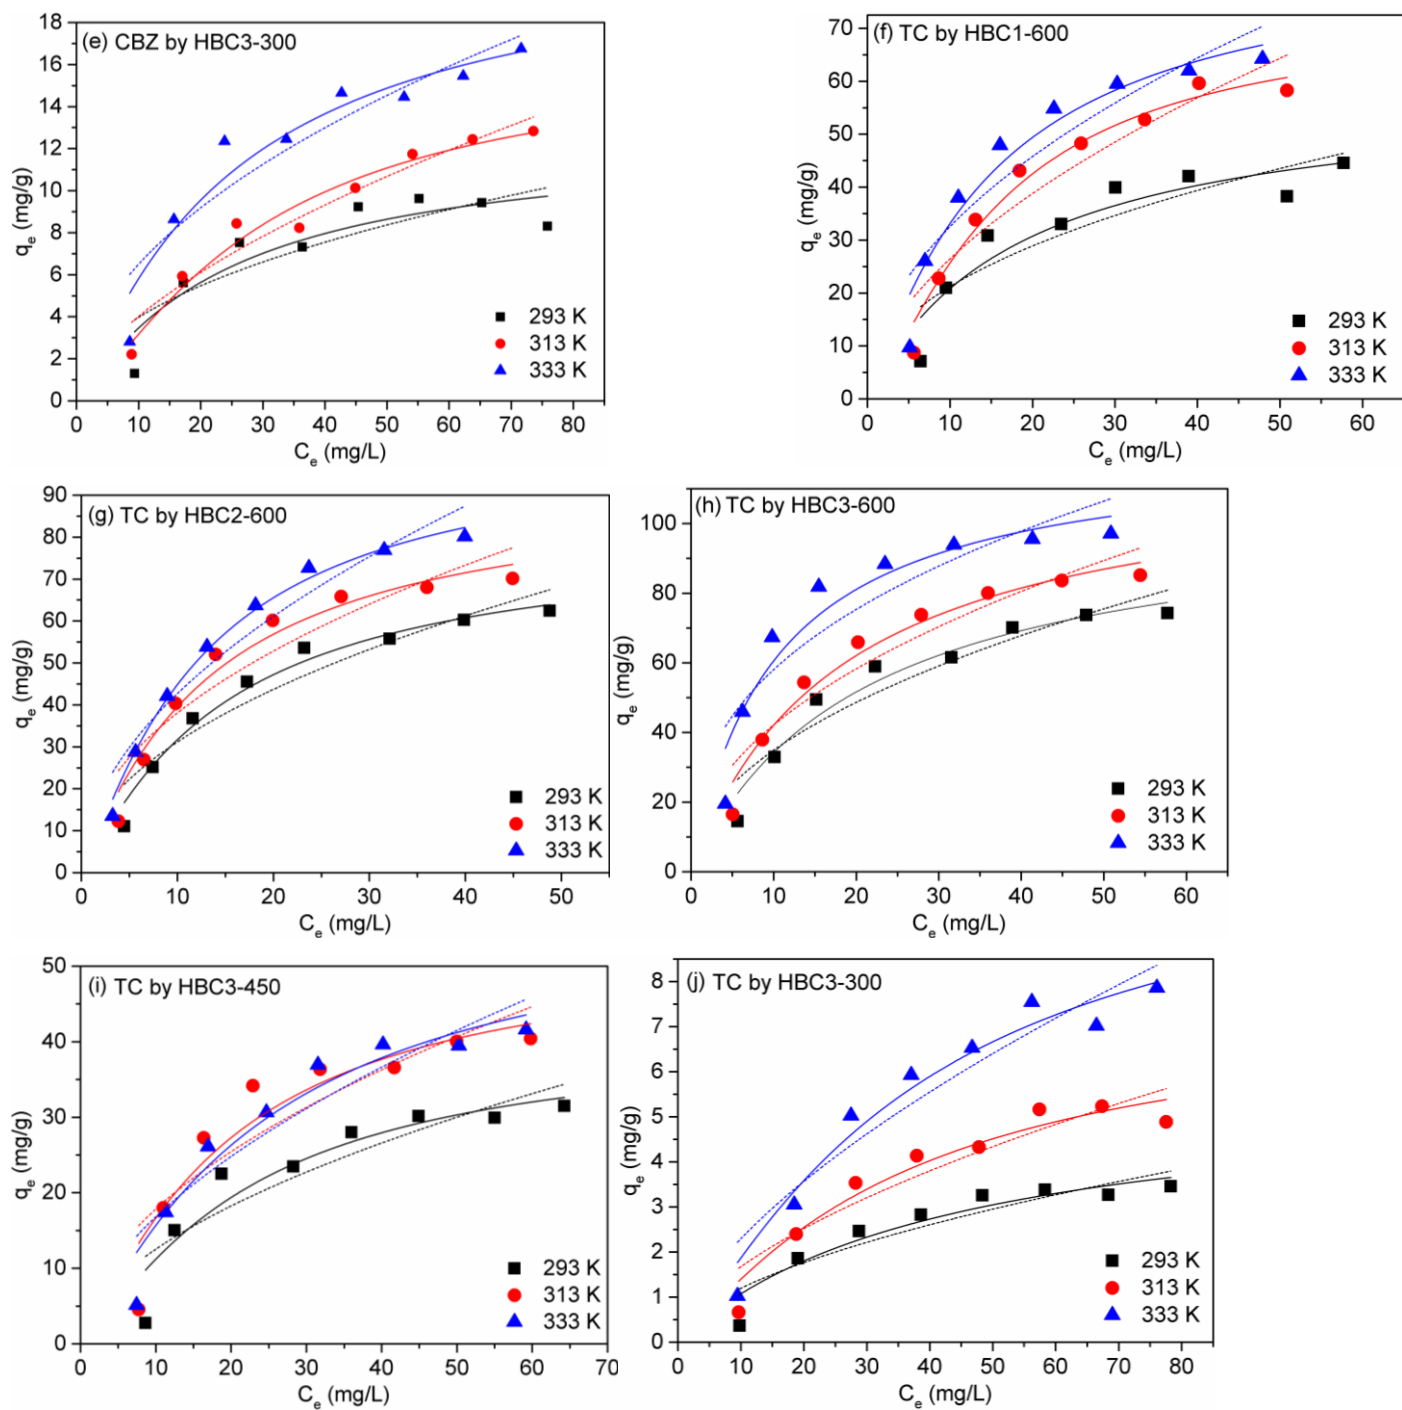

**Figure S6.** Sorption isotherms of CBZ and TC on HBC1-600 (a,f), HBC2-600 (b,g), HBC3-600 (c,h), HBC3-450 (d,i), and HBC3-300 (e,j). The solid and dashed lines are the fittings by Langmuir and Freundlich models, respectively. pH =  $6.0 \pm 0.1$ , T = 293 K, m/V = 0.50 g/L, I = 0.01 mol/L NaNO<sub>3</sub>.



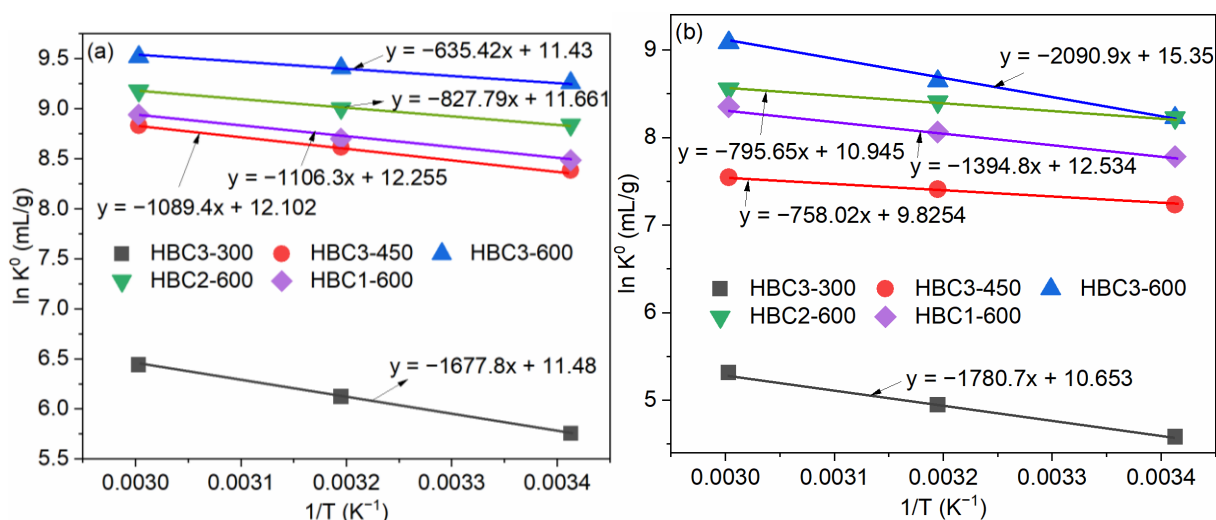

**Figure S7.** Linear plots of  $\ln K^0$  versus  $1/T$  for CBZ (a), and TC (b) adsorbed on HBCs.  $C_{[\text{CBZ}]\text{initial}} = C_{[\text{TC}]\text{initial}} = 60.0 \text{ mg/L}$ ,  $\text{pH} = 6.0 \pm 0.1$ ,  $T = 293 \text{ K}$ ,  $m/V = 0.5 \text{ g/L}$ ,  $I = 0.01 \text{ mol/L NaNO}_3$ .

**Table S1.** Components of simulated wastewater.

| Coexisting Components                              | Formula Weight | Concentration (mg/L) |
|----------------------------------------------------|----------------|----------------------|
| CaCl <sub>2</sub> ·2H <sub>2</sub> O               | 147.0          | 4.0                  |
| NaCl                                               | 58.4           | 7.0                  |
| NH <sub>4</sub> NO <sub>3</sub>                    | 80.0           | 180.0                |
| K <sub>2</sub> HPO <sub>4</sub> ·3H <sub>2</sub> O | 228.2          | 40.0                 |
| CH <sub>3</sub> COONa                              | 82.0           | 205.0                |
| MgCl <sub>2</sub> ·6H <sub>2</sub> O               | 203.3          | 3.4                  |
| C <sub>6</sub> H <sub>5</sub> COONa                | 144.1          | 110.0                |

**Table S2.** Deconvolution results of C1s, O1s, and N1s of HBCs.

| Elements | Assignment              | Binding Energy (eV) | Atom Ratio (%) |          |          |          |          |
|----------|-------------------------|---------------------|----------------|----------|----------|----------|----------|
|          |                         |                     | HBC1-600       | HBC2-600 | HBC3-600 | HBC3-450 | HBC3-300 |
| C 1s     | C–C                     | 284.8               | 88.29          | 81.75    | 77.32    | 61.55    | 57.05    |
|          | C–O/sp <sup>2</sup> C–N | 286.0               | 9.41           | 15.63    | 18.57    | 22.35    | 27.82    |
|          | C=O/sp <sup>3</sup> C–N | 287.6               | 2.30           | 2.62     | 4.11     | 9.10     | 7.97     |
|          | O–C=O                   | 289.0               | 0.00           | 0.00     | 0.00     | 6.99     | 7.15     |
| O 1s     | P=O/C=O                 | 530.9               | 5.16           | 13.15    | 16.98    | 0.00     | 0.00     |
|          | C–O/P–O                 | 532.9               | 94.84          | 86.85    | 83.02    | 100.00   | 100.00   |
| N 1s     | pyridinic–N             | 398.2               | 32.50          | 29.80    | 15.96    | 16.98    | 17.26    |
|          | amino–N                 | 399.2               | 20.65          | 26.30    | 29.78    | 23.87    | 25.79    |
|          | pyridonic–N             | 400.4               | 36.66          | 26.84    | 33.73    | 39.03    | 41.96    |
|          | quaternary–N            | 401.7               | 10.19          | 17.05    | 20.54    | 20.12    | 14.99    |

**Table S3.** Kinetic parameters of the sorption of Cu(II), Cd(II), and Pb(II) on HBCs (T=293 K, pH=5.0±0.1, I=0.01 mol/L NaNO<sub>3</sub>).

| Sorbates | Sorbents | $q_{e,exp}^a$<br>(mg/g) | Pseudo-first-order            |                         |                | Pseudo-second-order |                       |                |
|----------|----------|-------------------------|-------------------------------|-------------------------|----------------|---------------------|-----------------------|----------------|
|          |          |                         | $k_1$<br>(min <sup>-1</sup> ) | $q_{e,cal}^b$<br>(mg/g) | R <sup>2</sup> | $k_2$<br>(g/min/mg) | $q_{e,cal}$<br>(mg/g) | R <sup>2</sup> |
| Cu(II)   | HBC3-300 | 70.9                    | 0.0023                        | 18.8                    | 0.825          | 0.0004              | 71.4                  | 0.997          |
|          | HBC3-450 | 77.6                    | 0.0023                        | 15.0                    | 0.745          | 0.0004              | 78.1                  | 0.996          |
|          | HBC3-600 | 93.1                    | 0.0027                        | 21.8                    | 0.836          | 0.0002              | 94.6                  | 0.995          |
|          | HBC2-600 | 83.1                    | 0.0033                        | 25.4                    | 0.735          | 0.0003              | 85.3                  | 0.998          |
|          | HBC1-600 | 68.2                    | 0.0029                        | 18.8                    | 0.664          | 0.0004              | 69.9                  | 0.997          |
| Cd(II)   | HBC3-300 | 41.4                    | 0.0023                        | 10.1                    | 0.723          | 0.0007              | 42.9                  | 0.997          |
|          | HBC3-450 | 64.3                    | 0.0029                        | 15.5                    | 0.745          | 0.0004              | 66.2                  | 0.997          |
|          | HBC3-600 | 73.3                    | 0.0026                        | 17.0                    | 0.642          | 0.0004              | 75.3                  | 0.999          |
|          | HBC2-600 | 59.6                    | 0.0024                        | 14.3                    | 0.647          | 0.0004              | 61.8                  | 0.999          |
|          | HBC1-600 | 50.6                    | 0.0022                        | 11.2                    | 0.701          | 0.0007              | 52.2                  | 0.997          |
| Pb(II)   | HBC3-300 | 110.6                   | 0.0020                        | 8.5                     | 0.687          | 0.0014              | 112.1                 | 0.995          |
|          | HBC3-450 | 144.5                   | 0.0012                        | 11.6                    | 0.612          | 0.0021              | 147.3                 | 0.999          |
|          | HBC3-600 | 152.6                   | 0.0016                        | 8.9                     | 0.768          | 0.0015              | 151.7                 | 0.998          |
|          | HBC2-600 | 151.7                   | 0.0016                        | 7.7                     | 0.757          | 0.0016              | 151.3                 | 0.997          |
|          | HBC1-600 | 135.9                   | 0.0019                        | 11.7                    | 0.677          | 0.0010              | 137.4                 | 0.996          |

<sup>a)</sup> Experimental sorption capacity.

<sup>b)</sup> Calculated sorption capacity of pseudo-first or -second-order models.

**Table S4.** Langmuir and Freundlich fitting parameters for the sorption of Cu(II), Cd(II), and Pb(II) on HBCs.

| Sorbents | Sorbates | Temperature<br>(K) | Langmuir parameters |                     |                | Freundlich parameters                          |       |                |
|----------|----------|--------------------|---------------------|---------------------|----------------|------------------------------------------------|-------|----------------|
|          |          |                    | $K_L$<br>(L/mg)     | $q_{max}$<br>(mg/g) | R <sup>2</sup> | $K_F$<br>(mg <sup>1-n</sup> L <sup>n</sup> /g) | $n$   | R <sup>2</sup> |
| HBC3-300 | Cu(II)   | 293                | 0.0160              | 197.6               | 0.984          | 7.179                                          | 1.456 | 0.959          |
|          |          | 313                | 0.0178              | 239.4               | 0.973          | 8.436                                          | 1.460 | 0.942          |
|          |          | 333                | 0.0208              | 284.5               | 0.971          | 10.452                                         | 1.470 | 0.925          |
|          | Cd(II)   | 293                | 0.0225              | 88.9                | 0.986          | 2.876                                          | 1.375 | 0.971          |
|          |          | 313                | 0.0307              | 100.8               | 0.986          | 5.505                                          | 0.596 | 0.954          |
|          |          | 333                | 0.0347              | 107.4               | 0.992          | 6.573                                          | 1.629 | 0.969          |
|          | Pb(II)   | 293                | 0.0576              | 161.8               | 0.995          | 18.727                                         | 2.066 | 0.962          |
|          |          | 313                | 0.0359              | 182.5               | 0.987          | 17.290                                         | 1.850 | 0.984          |
|          |          | 333                | 0.0665              | 204.2               | 0.997          | 25.427                                         | 2.071 | 0.976          |
| HBC3-450 | Cu(II)   | 293                | 0.0303              | 186.2               | 0.961          | 10.330                                         | 1.773 | 0.877          |
|          |          | 313                | 0.0252              | 256.2               | 0.971          | 11.884                                         | 1.553 | 0.909          |
|          |          | 333                | 0.0276              | 303.8               | 0.958          | 14.195                                         | 1.510 | 0.893          |
|          | Cd(II)   | 293                | 0.0447              | 97.9                | 0.993          | 9.100                                          | 1.932 | 0.964          |
|          |          | 313                | 0.0539              | 105.8               | 0.997          | 12.108                                         | 2.068 | 0.976          |
|          |          | 333                | 0.0489              | 135.7               | 0.991          | 14.838                                         | 2.049 | 0.969          |
|          | Pb(II)   | 293                | 0.0157              | 287.5               | 0.972          | 9.914                                          | 1.321 | 0.910          |
|          |          | 313                | 0.0159              | 325.5               | 0.966          | 10.672                                         | 1.295 | 0.904          |
|          |          | 333                | 0.0158              | 356.5               | 0.979          | 11.067                                         | 1.266 | 0.939          |
| HBC3-600 | Cu(II)   | 293                | 0.0334              | 201.7               | 0.986          | 15.768                                         | 1.890 | 0.920          |
|          |          | 313                | 0.0342              | 246.4               | 0.979          | 17.855                                         | 1.795 | 0.918          |
|          |          | 333                | 0.0362              | 317.8               | 0.967          | 21.151                                         | 1.675 | 0.907          |
|          | Cd(II)   | 293                | 0.0170              | 176.5               | 0.984          | 4.417                                          | 1.330 | 0.936          |
|          |          | 313                | 0.0206              | 204.3               | 0.979          | 6.656                                          | 1.403 | 0.935          |
|          |          | 333                | 0.0188              | 243.9               | 0.987          | 6.449                                          | 1.315 | 0.949          |

|          |        |     |        |       |       |        |       |       |
|----------|--------|-----|--------|-------|-------|--------|-------|-------|
| HBC2-600 | Pb(II) | 293 | 0.0197 | 405.7 | 0.966 | 10.747 | 1.298 | 0.909 |
|          |        | 313 | 0.0158 | 451.2 | 0.974 | 11.016 | 1.231 | 0.925 |
|          |        | 333 | 0.0148 | 525.5 | 0.977 | 11.122 | 1.168 | 0.930 |
|          | Cu(II) | 293 | 0.0297 | 185.7 | 0.991 | 13.319 | 1.860 | 0.964 |
|          |        | 313 | 0.0295 | 226.5 | 0.998 | 14.679 | 1.762 | 0.977 |
|          |        | 333 | 0.0298 | 252.7 | 0.993 | 15.516 | 1.707 | 0.951 |
|          | Cd(II) | 293 | 0.0133 | 156.9 | 0.982 | 2.790  | 1.250 | 0.959 |
|          |        | 313 | 0.0143 | 185.9 | 0.989 | 3.650  | 1.267 | 0.976 |
|          |        | 333 | 0.0165 | 197.3 | 0.969 | 6.610  | 1.508 | 0.927 |
| HBC1-600 | Pb(II) | 293 | 0.0252 | 328.5 | 0.962 | 13.185 | 1.452 | 0.905 |
|          |        | 313 | 0.0250 | 387.7 | 0.974 | 16.569 | 1.390 | 0.926 |
|          |        | 333 | 0.0243 | 413.6 | 0.976 | 14.538 | 1.328 | 0.938 |
|          | Cu(II) | 293 | 0.0202 | 169.1 | 0.972 | 8.136  | 1.691 | 0.915 |
|          |        | 313 | 0.0195 | 204.8 | 0.977 | 8.873  | 1.624 | 0.924 |
|          |        | 333 | 0.0181 | 269.0 | 0.970 | 9.550  | 1.512 | 0.923 |
|          | Cd(II) | 293 | 0.0116 | 128.9 | 0.984 | 2.611  | 1.293 | 0.945 |
|          |        | 313 | 0.0188 | 146.8 | 0.982 | 4.176  | 1.444 | 0.930 |
|          |        | 333 | 0.0173 | 167.9 | 0.986 | 4.714  | 1.387 | 0.941 |
|          | Pb(II) | 293 | 0.0248 | 289.9 | 0.982 | 10.184 | 1.379 | 0.951 |
|          |        | 313 | 0.0266 | 318.1 | 0.989 | 12.183 | 1.401 | 0.965 |
|          |        | 333 | 0.0295 | 360.9 | 0.988 | 16.057 | 1.449 | 0.957 |

**Table S5.** Comparison of  $q_{max}$  for the sorption of Cu(II), Cd(II), and Pb(II) on HBCs with other sorbents.

| Metals | Sorbents                                                  | Experimental Conditions | $q_{max}$<br>(mg/g) | References |
|--------|-----------------------------------------------------------|-------------------------|---------------------|------------|
| Cu(II) | Amino-modified sawdust biochar                            | T 293 K, pH 5.0         | 16.1                | [1]        |
|        | Alkali-modified hickory biochar                           | T 298 K, pH 5.0         | 17.9                | [2]        |
|        | Pyromellitic dianhydride-rice straw biochar               | T 298 K, pH 5.0         | 24.6                | [3]        |
|        | MnO <sub>x</sub> -hickory wood biochar                    | T 295 K, pH 6.0         | 34.2                | [4]        |
|        | Magnetic marine algae biochar                             | T 295 K, pH 5.0         | 46.7                | [5]        |
|        | Dairy manure biochar                                      | T 298 K, pH 5.0         | 54.4                | [6]        |
|        | H <sub>2</sub> O <sub>2</sub> -treated yak manure biochar | T 298 K, pH 5.0         | 64.9                | [7]        |
|        | Multiwalled carbon nanotubes                              | T 298 K, pH 3.0         | 118.4               | [8]        |
|        | Graphene oxide aerogel                                    | T 298 K, pH 6.3         | 19.7                | [9]        |
| Cd(II) | HBC3-600                                                  | T 293 K, pH 5.0         | 201.7               | This study |
|        | Zero-valent iron nanoparticle                             | T 293–298 K, pH 5.0     | 110                 | [10]       |
|        | Magnetic GO-MgAl-LDH                                      | T 298 K, pH 4.0         | 45.1                | [11]       |
|        | Hickory wood biochar                                      | T 295 K, pH 5.0         | 4.8                 | [4]        |
|        | Ball-milled bamboo biochar                                | T 298 K, pH 5.45        | 40.0                | [12]       |
|        | Hydroxyapatite                                            | T 298 K, pH 5.45        | 49.4                | [13]       |
|        | Cauliflower leaves biochar                                | T 298 K, pH 6.0         | 73.8                | [14]       |
|        | Hydrothermal biochar                                      | T 293 K, pH 5.0         | 128.2               | [15]       |
|        | Carbon nanotubes                                          | T 303 K, pH 6.0         | 14.5                | [16]       |
| Pb(II) | Graphene oxide                                            | T 298 K, pH 7.0         | 401.1               | [17]       |
|        | HBC3-600                                                  | T 293 K pH 5.0          | 176.5               | This study |
|        | Hydroxyapatite                                            | T 298 K, pH 5.45        | 87.5                | [13]       |
|        | Hickory wood biochar                                      | T 295 K, pH 5.0         | 71.4                | [4]        |
|        | Activated carbon                                          | T 298 K, pH 6.0         | 171.0               | [18]       |
|        | Magnetic GO-MgAl-LDH                                      | T 298 K, pH 4.0         | 192.3               | [11]       |

|                                                      |                    |       |            |
|------------------------------------------------------|--------------------|-------|------------|
| Zero-valent iron nanoparticle                        | T 293–298K, pH 4.8 | 170   | [10]       |
| Ball-milled wheat straw biochar                      | T 298 K, pH 5.45   | 134.7 | [19]       |
| Rice straw biochars                                  | T 298 K, pH 6.0    | 198.2 | [20]       |
| Cauliflower leaves biochar                           | T 298 K, pH 6.0    | 177.8 | [14]       |
| H <sub>2</sub> O <sub>2</sub> -coconut fiber biochar | T 298 K, pH 6.0    | 105.5 | [21]       |
| Anaerobic digestion sludge biochar                   | T 298 K, pH 6.0    | 51.2  | [22]       |
| Carbon nanotubes                                     | T 298 K, pH 5.0    | 49.7  | [23]       |
| Graphene oxide                                       | T 288 K, pH 5.0    | 327.9 | [24]       |
| HBC3-600                                             | T 293 K pH 5.0     | 405.7 | This study |

**Table S6.** Thermodynamic parameters for the sorption of Cu(II), Cd(II), and Pb(II) on HBCs.

| Sorbents | Metals | T (K) | $\Delta H^\circ$ (kJ/mol) | $\Delta S^\circ$ (J/mol K) | $\Delta G^\circ$ (kJ/mol) |
|----------|--------|-------|---------------------------|----------------------------|---------------------------|
| HBC3-300 | Cu(II) | 293   | 10.52                     | 103.38                     | -19.77                    |
|          |        | 313   | 10.72                     |                            | -21.63                    |
|          |        | 333   | 10.52                     |                            | -23.91                    |
|          | Cd(II) | 293   | 15.66                     | 114.16                     | -17.79                    |
|          |        | 313   | 15.29                     |                            | -20.45                    |
|          |        | 333   | 15.67                     |                            | -22.35                    |
|          | Pb(II) | 293   | 6.93                      | 94.19                      | -20.67                    |
|          |        | 313   | 7.16                      |                            | -22.32                    |
|          |        | 333   | 6.93                      |                            | -24.44                    |
| HBC3-450 | Cu(II) | 293   | 12.11                     | 111.94                     | -20.69                    |
|          |        | 313   | 12.38                     |                            | -22.66                    |
|          |        | 333   | 12.11                     |                            | -25.16                    |
|          | Cd(II) | 293   | 5.62                      | 87.16                      | -19.92                    |
|          |        | 313   | 5.70                      |                            | -21.57                    |
|          |        | 333   | 5.61                      |                            | -23.41                    |
|          | Pb(II) | 293   | 4.52                      | 88.35                      | -21.39                    |
|          |        | 313   | 4.49                      |                            | -23.16                    |
|          |        | 333   | 4.52                      |                            | -24.90                    |
| HBC3-600 | Cu(II) | 293   | 14.94                     | 122.09                     | -20.83                    |
|          |        | 313   | 15.24                     |                            | -22.97                    |
|          |        | 333   | 14.93                     |                            | -25.73                    |
|          | Cd(II) | 293   | 9.25                      | 98.94                      | -19.15                    |
|          |        | 313   | 8.88                      |                            | -21.46                    |
|          |        | 333   | 9.26                      |                            | -23.02                    |
|          | Pb(II) | 293   | 3.63                      | 86.67                      | -21.76                    |
|          |        | 313   | 3.46                      |                            | -23.66                    |
|          |        | 333   | 3.93                      |                            | -25.23                    |
| HBC2-600 | Cu(II) | 293   | 11.88                     | 108.69                     | -19.97                    |
|          |        | 313   | 11.64                     |                            | -22.38                    |
|          |        | 333   | 11.87                     |                            | -24.32                    |
|          | Cd(II) | 293   | 12.49                     | 104.55                     | -18.15                    |
|          |        | 313   | 12.46                     |                            | -20.26                    |
|          |        | 333   | 12.49                     |                            | -22.33                    |
|          | Pb(II) | 293   | 4.57                      | 90.03                      | -21.81                    |
|          |        | 313   | 4.70                      |                            | -23.48                    |
|          |        | 333   | 4.56                      |                            | -25.42                    |
| HBC1-600 | Cu(II) | 293   | 9.49                      | 98.39                      | -19.33                    |
|          |        | 313   | 9.63                      |                            | -21.17                    |

|        |     |       |       |        |
|--------|-----|-------|-------|--------|
| Cd(II) | 333 | 9.49  | 97.89 | -23.27 |
|        | 293 | 10.84 |       | -17.84 |
|        | 313 | 10.79 |       | -19.85 |
| Pb(II) | 333 | 10.84 | 98.17 | -21.75 |
|        | 293 | 7.62  |       | -21.29 |
|        | 313 | 7.82  |       | -23.06 |
|        | 333 | 7.63  |       | -25.22 |

**Table S7.** Kinetic parameters of the sorption of CBZ and TC on HBCs (T = 293 K, pH = 6.0 ± 0.1, I = 0.01 mol/L NaNO<sub>3</sub>).

| Sorbates | Sorbents | $q_{e,exp}^{a)}$<br>(mg/g) | Pseudo-first-order            |                            |                | Pseudo-second-order |                       |                |
|----------|----------|----------------------------|-------------------------------|----------------------------|----------------|---------------------|-----------------------|----------------|
|          |          |                            | $k_1$<br>(min <sup>-1</sup> ) | $q_{e,cal}^{b)}$<br>(mg/g) | R <sup>2</sup> | $k_2$<br>(g/min/mg) | $q_{e,cal}$<br>(mg/g) | R <sup>2</sup> |
| CBZ      | HBC3-300 | 9.6                        | 0.0007                        | 2.3                        | 0.325          | 0.0113              | 9.8                   | 0.998          |
|          | HBC3-450 | 60.9                       | 0.0015                        | 5.1                        | 0.245          | 0.0024              | 63.9                  | 0.999          |
|          | HBC3-600 | 102.1                      | 0.0016                        | 6.1                        | 0.218          | 0.0028              | 102.0                 | 0.996          |
|          | HBC2-600 | 89.3                       | 0.0013                        | 6.2                        | 0.205          | 0.0030              | 90.5                  | 0.998          |
|          | HBC1-600 | 78.1                       | 0.0017                        | 9.1                        | 0.468          | 0.0014              | 80.6                  | 0.996          |
| TC       | HBC3-300 | 3.4                        | 0.0006                        | 2.8                        | 0.763          | 0.0009              | 3.5                   | 0.994          |
|          | HBC3-450 | 30.2                       | 0.0014                        | 16.8                       | 0.715          | 0.0002              | 34.8                  | 0.988          |
|          | HBC3-600 | 70.1                       | 0.0018                        | 52.7                       | 0.742          | 0.0001              | 72.4                  | 0.992          |
|          | HBC2-600 | 55.7                       | 0.0017                        | 44.0                       | 0.747          | 0.0001              | 57.5                  | 0.991          |
|          | HBC1-600 | 42.1                       | 0.0013                        | 18.9                       | 0.701          | 0.0002              | 44.0                  | 0.993          |

<sup>a)</sup> Experimental sorption capacity.

<sup>b)</sup> Calculated sorption capacity of pseudo-first or -second-order models.

**Table S8.** Langmuir and Freundlich fitting parameters for the sorption of CBZ and TC on HBCs.

| Sorbents | Sorbates | Temperature | Langmuir parameters |                     |                | Freundlich parameters                          |       |                |
|----------|----------|-------------|---------------------|---------------------|----------------|------------------------------------------------|-------|----------------|
|          |          |             | $K_L$<br>(L/mg)     | $q_{max}$<br>(mg/g) | R <sup>2</sup> | $K_F$<br>(mg <sup>1-n</sup> L <sup>n</sup> /g) | $n$   | R <sup>2</sup> |
| HBC3-300 | CBZ      | 293         | 0.031               | 12.5                | 0.924          | 1.367                                          | 2.159 | 0.692          |
|          |          | 313         | 0.011               | 16.5                | 0.972          | 0.991                                          | 1.645 | 0.934          |
|          |          | 333         | 0.029               | 21.9                | 0.939          | 2.054                                          | 1.996 | 0.846          |
|          | TC       | 293         | 0.023               | 5.7                 | 0.904          | 0.329                                          | 1.783 | 0.823          |
|          |          | 313         | 0.015               | 7.6                 | 0.953          | 0.437                                          | 1.689 | 0.857          |
|          |          | 333         | 0.012               | 11.3                | 0.966          | 0.528                                          | 1.638 | 0.892          |
| HBC3-450 | CBZ      | 293         | 0.014               | 71.7                | 0.973          | 10.51                                          | 1.980 | 0.797          |
|          |          | 313         | 0.015               | 89.2                | 0.983          | 9.91                                           | 1.715 | 0.832          |
|          |          | 333         | 0.014               | 104.8               | 0.986          | 12.27                                          | 1.669 | 0.799          |
|          | TC       | 293         | 0.021               | 41.1                | 0.913          | 3.59                                           | 1.845 | 0.778          |
|          |          | 313         | 0.028               | 52.9                | 0.904          | 5.49                                           | 1.953 | 0.763          |
|          |          | 333         | 0.026               | 59.3                | 0.945          | 4.62                                           | 1.783 | 0.843          |
| HBC3-600 | CBZ      | 293         | 0.075               | 168.9               | 0.965          | 21.01                                          | 1.957 | 0.873          |
|          |          | 313         | 0.061               | 191.1               | 0.968          | 20.73                                          | 1.715 | 0.883          |
|          |          | 333         | 0.052               | 223.8               | 0.976          | 19.79                                          | 1.529 | 0.912          |
|          | TC       | 293         | 0.048               | 105.1               | 0.963          | 11.57                                          | 2.088 | 0.886          |
|          |          | 313         | 0.055               | 118.5               | 0.973          | 14.39                                          | 2.141 | 0.891          |
|          |          | 333         | 0.087               | 132.7               | 0.931          | 21.37                                          | 2.653 | 0.792          |
| HBC2-600 | CBZ      | 293         | 0.049               | 134.8               | 0.984          | 15.51                                          | 1.890 | 0.884          |
|          |          | 313         | 0.044               | 151.5               | 0.983          | 15.15                                          | 1.757 | 0.912          |

|          |     |     |       |       |       |       |       |       |
|----------|-----|-----|-------|-------|-------|-------|-------|-------|
| HBC1-600 | TC  | 333 | 0.047 | 174.7 | 0.988 | 17.83 | 1.658 | 0.927 |
|          |     | 293 | 0.048 | 80.1  | 0.984 | 10.16 | 2.053 | 0.896 |
|          |     | 313 | 0.059 | 92.4  | 0.971 | 12.83 | 2.114 | 0.966 |
|          | CBZ | 333 | 0.051 | 103.1 | 0.991 | 12.98 | 1.934 | 0.924 |
|          |     | 293 | 0.026 | 108.8 | 0.983 | 11.06 | 1.761 | 0.899 |
|          |     | 313 | 0.023 | 120.9 | 0.981 | 12.52 | 1.701 | 0.888 |
|          | TC  | 333 | 0.027 | 136.8 | 0.971 | 14.87 | 1.704 | 0.859 |
|          |     | 293 | 0.055 | 58.6  | 0.911 | 7.58  | 2.237 | 0.772 |
|          |     | 313 | 0.023 | 72.8  | 0.981 | 7.42  | 1.812 | 0.883 |
|          |     | 333 | 0.048 | 84.9  | 0.948 | 10.47 | 2.033 | 0.848 |

**Table S9.** Comparison of  $q_{max}$  for the sorption of CBZ and TC on HBCs with other sorbents.

| Metals | Sorbents                                        | Experimental conditions | $q_{max}$<br>(mg/g) | References |
|--------|-------------------------------------------------|-------------------------|---------------------|------------|
| CBZ    | Biochar/Fe <sub>3</sub> O <sub>4</sub>          | pH 7.0                  | 62.7                | [25]       |
|        | Activated carbon/Fe <sub>3</sub> O <sub>4</sub> | pH 7.0                  | 135.1               | [25]       |
|        | Zirconium MOF UiO-66                            | pH 6.0                  | 37.2                | [26]       |
|        | Activated palm kernel shell                     | pH 7.0                  | 62.4                | [27]       |
|        | MOF-derived magnetic porous carbon              | pH 7.2                  | 37.9                | [28]       |
|        | SWCNT                                           | pH 7.0                  | 185                 | [29]       |
|        | Pine-wood nanobiochar                           | pH 6.0                  | 116                 | [30]       |
|        | MWCNT-COOH                                      | pH 7.2                  | 110                 | [31]       |
|        | Graphene oxide                                  | pH 7.2                  | 215                 | [31]       |
|        | HBC3-600                                        | pH 6.0                  | 168.9               | This study |
| TC     | Biochar/Fe <sub>3</sub> O <sub>4</sub>          | pH 7.0                  | 94.2                | [25]       |
|        | Activated carbon/Fe <sub>3</sub> O <sub>4</sub> | pH 7.0                  | 45.3                | [25]       |
|        | Zirconium MOF UiO-66                            | pH 6.0                  | 23.1                | [26]       |
|        | Sewage sludge biochar                           | pH 7.0                  | 5.8                 | [32]       |
|        | Activated sludge-biochar                        | pH 7.0                  | 116.9               | [33]       |
|        | Pharmaceutical sludge biochar                   | pH 6.0                  | 157.4               | [34]       |
|        | Ferric-activated sludge sorbent                 | pH 6.0                  | 40.8                | [35]       |
|        | Iron-loaded sludge biochar                      | pH 2.0–10.0             | 104.9               | [36]       |
|        | Fe/S wasted sludge biochar                      | pH 3.0                  | 174.1               | [37]       |
|        | HBC3-600                                        | pH 6.0                  | 105.1               | This study |

**Table S10.** Thermodynamic parameters for the sorption of CBZ and TC on HBCs.

| Sorbents | Pharmaceuticals | T (K) | $\Delta H^\circ$ (kJ/mol) | $\Delta S^\circ$ (J/mol K) | $\Delta G^\circ$ (kJ/mol) |
|----------|-----------------|-------|---------------------------|----------------------------|---------------------------|
| HBC3-300 | CBZ             | 293   | 13.95                     | 95.44                      | -14.01                    |
|          |                 | 313   | 14.49                     |                            | -15.37                    |
|          |                 | 333   | 13.95                     |                            | -17.83                    |
|          | TC              | 293   | 14.79                     | 88.57                      | -11.16                    |
|          |                 | 313   | 14.75                     |                            | -12.87                    |
|          |                 | 333   | 14.78                     |                            | -14.71                    |
| HBC3-450 | CBZ             | 293   | 9.05                      | 100.62                     | -20.43                    |
|          |                 | 313   | 9.33                      |                            | -22.16                    |
|          |                 | 333   | 9.05                      |                            | -24.46                    |
|          | TC              | 293   | 6.15                      | 81.69                      | -17.62                    |
|          |                 | 313   | 6.12                      |                            | -19.29                    |



|          |     |     |       |        |        |
|----------|-----|-----|-------|--------|--------|
| HBC3-600 | CBZ | 333 | 6.14  |        | -20.89 |
|          |     | 293 | 5.29  | 95.03  | -22.55 |
|          |     | 313 | 5.26  |        | -24.49 |
|          | TC  | 333 | 5.30  |        | -26.35 |
|          |     | 293 | 17.36 | 127.62 | -20.04 |
|          |     | 313 | 17.84 |        | -22.11 |
| HBC2-600 | CBZ | 333 | 17.34 |        | -25.15 |
|          |     | 293 | 6.87  | 96.95  | -21.53 |
|          |     | 313 | 7.04  |        | -23.31 |
|          | TC  | 333 | 6.87  |        | -25.42 |
|          |     | 293 | 6.49  | 90.99  | -20.04 |
|          |     | 313 | 6.33  |        | -22.01 |
| HBC1-600 | CBZ | 333 | 6.47  |        | -23.68 |
|          |     | 293 | 9.18  | 101.89 | -20.68 |
|          |     | 313 | 9.25  |        | -22.64 |
|          | TC  | 333 | 9.17  |        | -24.76 |
|          |     | 293 | 11.58 | 104.21 | -18.95 |
|          |     | 313 | 11.77 |        | -20.85 |
|          |     | 333 | 11.57 |        | -23.13 |

## References

1. Yang, G.-X.; Jiang, H. Amino modification of biochar for enhanced adsorption of copper ions from synthetic wastewater. *Water Res.* **2014**, *48*, 396–405, <https://doi.org/10.1016/j.watres.2013.09.050>.
2. Ding, Z.; Hu, X.; Wan, Y.; Wang, S.; Gao, B. Removal of lead, copper, cadmium, zinc, and nickel from aqueous solutions by alkali-modified biochar: Batch and column tests. *J. Ind. Eng. Chem.* **2016**, *33*, 239–245, <https://doi.org/10.1016/j.jiec.2015.10.007>.
3. Deng, J.; Liu, Y.; Liu, S.; Zeng, G.; Tan, X.; Huang, B.; Tang, X.; Wang, S.; Hua, Q.; Yan, Z. Competitive adsorption of Pb(II), Cd(II) and Cu(II) onto chitosan-pyromellitic dianhydride modified biochar. *J. Colloid Interface Sci.* **2017**, *506*, 355–364, <https://doi.org/10.1016/j.jcis.2017.07.069>.
4. Wang, H.; Gao, B.; Wang, S.; Fang, J.; Xue, Y.; Yang, K. Removal of Pb(II), Cu(II), and Cd(II) from aqueous solutions by biochar derived from KMnO<sub>4</sub> treated hickory wood. *Bioresour. Technol.* **2015**, *197*, 356–362, <https://doi.org/10.1016/j.biortech.2015.08.132>.
5. Son, E.-B.; Poo, K.-M.; Chang, J.-S.; Chae, K.-J. Heavy metal removal from aqueous solutions using engineered magnetic biochars derived from waste marine macro-algal biomass. *Sci. Total Environ.* **2018**, *615*, 161–168, <https://doi.org/10.1016/j.scitotenv.2017.09.171>.
6. Xu, X.; Cao, X.; Zhao, L.; Wang, H.; Yu, H.; Gao, B. Removal of Cu, Zn, and Cd from aqueous solutions by the dairy manure-derived biochar. *Environ. Sci. Pollut. Res.* **2012**, *20*, 358–368, <https://doi.org/10.1007/s11356-012-0873-5>.
7. Wang, Y.; Liu, R. H<sub>2</sub>O<sub>2</sub> treatment enhanced the heavy metals removal by manure biochar in aqueous solutions. *Sci. Total Environ.* **2018**, *628–629*, 1139–1148, <https://doi.org/10.1016/j.scitotenv.2018.02.137>.
8. Gupta, V.K.; Agarwal, S.; Bharti, A.K.; Sadegh, H. Adsorption mechanism of functionalized multi-walled carbon nanotubes for advanced Cu (II) removal. *J. Mol. Liq.* **2017**, *230*, 667–673, <https://doi.org/10.1016/j.molliq.2017.01.083>.
9. Mi, X.; Huang, G.; Xie, W.; Wang, W.; Liu, Y.; Gao, J. Preparation of graphene oxide aerogel and its adsorption for Cu<sup>2+</sup> ions. *Carbon* **2012**, *50*, 4856–4864, <https://doi.org/10.1016/j.carbon.2012.06.013>.
10. Yoon, K.; Cho, D.-W.; Tsang, D.; Bolan, N.; Rinklebe, J.; Song, H. Fabrication of engineered biochar from paper mill sludge and its application into removal of arsenic and cadmium in acidic water. *Bioresour. Technol.* **2017**, *246*, 69–75, <https://doi.org/10.1016/j.biortech.2017.07.020>.

11. Huang, Q.; Chen, Y.; Yu, H.; Yan, L.; Zhang, J.; Wang, B.; Du, B.; Xing, L. Magnetic graphene oxide/MgAl-layered double hydroxide nanocomposite: one-pot solvothermal synthesis, adsorption performance and mechanisms for Pb<sup>2+</sup>, Cd<sup>2+</sup>, and Cu<sup>2+</sup>. *Chem. Eng. J.* **2018**, *341*, 1–9, <https://doi.org/10.1016/j.cej.2018.01.156>.
12. Wang, B.; Gao, B.; Wan, Y. Entrapment of ball-milled biochar in Ca-alginate beads for the removal of aqueous Cd(II). *J. Ind. Eng. Chem.* **2017**, *61*, 161–168, <https://doi.org/10.1016/j.jiec.2017.12.013>.
13. Chen, S.B.; Ma, Y.B.; Chen, L.; Xian, K. Adsorption of aqueous Cd<sup>2+</sup>, Pb<sup>2+</sup>, Cu<sup>2+</sup> ions by nano-hydroxyapatite: Single- and multi-metal competitive adsorption study. *Geochem. J.* **2010**, *44*, 233–239, <https://doi.org/10.2343/geochemj.1.0065>.
14. Ahmad, Z.; Gao, B.; Mosa, A.; Yu, H.; Yin, X.; Bashir, A.; Ghoveisi, H.; Wang, S. Removal of Cu(II), Cd(II) and Pb(II) ions from aqueous solutions by biochars derived from potassium-rich biomass. *J. Clean. Prod.* **2018**, *180*, 437–449, <https://doi.org/10.1016/j.jclepro.2018.01.133>.
15. Zhao, X.; Li, M.; Zhai, F.; Hou, Y.; Hu, R. Phosphate modified hydrochars produced via phytic acid-assisted hydrothermal carbonization for efficient removal of U(VI), Pb(II) and Cd(II). *J. Environ. Manag.* **2021**, *298*, 113487, <https://doi.org/10.1016/j.jenvman.2021.113487>.
16. Sun, W.; Jiang, B.; Wang, F.; Xu, N. Effect of carbon nanotubes on Cd(II) adsorption by sediments. *Chem. Eng. J.* **2014**, *264*, 645–653, <https://doi.org/10.1016/j.cej.2014.11.137>.
17. Guo, T.; Bulin, C.; Ma, Z.; Li, B.; Zhang, Y.; Zhang, B.; Xing, R.; Ge, X. Mechanism of Cd(II) and Cu(II) Adsorption onto Few-Layered Magnetic Graphene Oxide as an Efficient Adsorbent. *ACS Omega* **2021**, *6*, 16535–16545, <https://doi.org/10.1021/acsomega.1c01770>.
18. Kyzas, G.Z.; Bomis, G.; Kosheleva, R.I.; Efthimiadou, E.K.; Favvas, E.; Kostoglou, M.; Mitropoulos, A.C. Nanobubbles effect on heavy metal ions adsorption by activated carbon. *Chem. Eng. J.* **2018**, *356*, 91–97, <https://doi.org/10.1016/j.cej.2018.09.019>.
19. Cao, Y.; Xiao, W.; Shen, G.; Ji, G.; Zhang, Y.; Gao, C.; Han, L. Carbonization and ball milling on the enhancement of Pb(II) adsorption by wheat straw: Competitive effects of ion exchange and precipitation. *Bioresour. Technol.* **2018**, *273*, 70–76, <https://doi.org/10.1016/j.biortech.2018.10.065>.
20. Shen, Z.; Hou, D.; Jin, F.; Shi, J.; Fan, X.; Tsang, D.; Alessi, D. Effect of production temperature on lead removal mechanisms by rice straw biochars. *Sci. Total Environ.* **2018**, *655*, 751–758, <https://doi.org/10.1016/j.scitotenv.2018.11.282>.
21. Wu, W.; Li, J.; Lan, T.; Mueller, K.; Niazi, N.K.; Chen, X.; Xu, S.; Zheng, L.; Chu, Y.; Li, J.; et al. Unraveling sorption of lead in aqueous solutions by chemically modified biochar derived from coconut fiber: A microscopic and spectroscopic investigation. *Sci. Total Environ.* **2016**, *576*, 766–774, <https://doi.org/10.1016/j.scitotenv.2016.10.163>.
22. Ho, S.-H.; Chen, Y.-D.; Yang, Z.-K.; Nagarajan, D.; Chang, J.-S.; Ren, N.-Q. High-efficiency removal of lead from wastewater by biochar derived from anaerobic digestion sludge. *Bioresour. Technol.* **2017**, *246*, 142–149, <https://doi.org/10.1016/j.biortech.2017.08.025>.
23. Wang, H.; Zhou, A.; Peng, F.; Yu, H.; Chen, L. Adsorption characteristic of acidified carbon nanotubes for heavy metal Pb(II) in aqueous solution. *Mater. Sci. Eng. A* **2007**, *466*, 201–206, <https://doi.org/10.1016/j.msea.2007.02.097>.
24. Bai, C.; Wang, L.; Zhu, Z. Adsorption of Cr(III) and Pb(II) by graphene oxide/alginate hydrogel membrane: Characterization, adsorption kinetics, isotherm and thermodynamics studies. *Int. J. Biol. Macromol.* **2019**, *147*, 898–910, <https://doi.org/10.1016/j.ijbiomac.2019.09.249>.
25. Shan, D.; Deng, S.; Zhao, T.; Wang, B.; Wang, Y.; Huang, J.; Yu, G.; Winglee, J.; Wiesner, M.R. Preparation of ultrafine magnetic biochar and activated carbon for pharmaceutical adsorption and subsequent degradation by ball milling. *J. Hazard. Mater.* **2015**, *305*, 156–163, <https://doi.org/10.1016/j.jhazmat.2015.11.047>.
26. Chen, C.; Chen, D.; Xie, S.; Quan, H.; Luo, X.; Guo, L. Adsorption Behaviors of Organic Micropollutants on Zirconium Metal–Organic Framework UiO-66: Analysis of Surface Interactions. *ACS Appl. Mater. Interfaces* **2017**, *9*, 41043–41054, <https://doi.org/10.1021/acsaami.7b13443>.
27. To, M.-H.; Hadi, P.; Hui, C.-W.; Lin, C.S.K.; McKay, G. Mechanistic study of atenolol, acebutolol and carbamazepine adsorption on waste biomass derived activated carbon. *J. Mol. Liq.* **2017**, *241*, 386–398, <https://doi.org/10.1016/j.molliq.2017.05.037>.

28. Chen, D.; Chen, C.; Shen, W.; Quan, H.; Chen, S.; Xie, S.; Luo, X.; Guo, L. MOF-derived magnetic porous carbon-based sorbent: Synthesis, characterization, and adsorption behavior of organic micropollutants. *Adv. Powder Technol.* **2017**, *28*, 1769–1779, <https://doi.org/10.1016/j.appt.2017.04.018>.
29. Liu, F.-F.; Zhao, J.; Wang, S.; Du, P.; Xing, B. Effects of Solution Chemistry on Adsorption of Selected Pharmaceuticals and Personal Care Products (PPCPs) by Graphenes and Carbon Nanotubes. *Environ. Sci. Technol.* **2014**, *48*, 13197–13206, <https://doi.org/10.1021/es5034684>.
30. Naghdi, M.; Taheran, M.; Pulicharla, R.; Rouissi, T.; Brar, S.K.; Verma, M.; Surampalli, R. Pine-wood derived nanobiochar for removal of carbamazepine from aqueous media: Adsorption behavior and influential parameters. *Arab. J. Chem.* **2019**, *12*, 5292–5301, <https://doi.org/10.1016/j.arabjc.2016.12.025>.
31. Cai, N.; Larese-Casanova, P. Sorption of carbamazepine by commercial graphene oxides: A comparative study with granular activated carbon and multiwalled carbon nanotubes. *J. Colloid Interface Sci.* **2014**, *426*, 152–161, <https://doi.org/10.1016/j.jcis.2014.03.038>.
32. Zhao, J.; Gao, F.; Sun, Y.; Fang, W.; Li, X.; Dai, Y. New use for biochar derived from bovine manure for tetracycline removal. *J. Environ. Chem. Eng.* **2021**, *9*, 105585, <https://doi.org/10.1016/j.jece.2021.105585>.
33. Chen, W.; Zhao, B.; Guo, Y.; Guo, Y.; Zheng, Z.; Pak, T.; Li, G. Effect of hydrothermal pretreatment on pyrolyzed sludge biochars for tetracycline adsorption. *J. Environ. Chem. Eng.* **2021**, *9*, 106557, <https://doi.org/10.1016/j.jece.2021.106557>.
34. Liu, H.; Xu, G.; Li, G. The characteristics of pharmaceutical sludge-derived biochar and its application for the adsorption of tetracycline. *Sci. Total Environ.* **2020**, *747*, 141492, <https://doi.org/10.1016/j.scitotenv.2020.141492>.
35. Yang, X.; Xu, G.; Yu, H.; Zhang, Z. Preparation of ferric-activated sludge-based adsorbent from biological sludge for tetracycline removal. *Bioresour. Technol.* **2016**, *211*, 566–573, <https://doi.org/10.1016/j.biortech.2016.03.140>.
36. Wei, J.; Liu, Y.; Li, J.; Zhu, Y.; Yu, H.; Peng, Y. Adsorption and co-adsorption of tetracycline and doxycycline by one-step synthesized iron loaded sludge biochar. *Chemosphere* **2019**, *236*, 124254, <https://doi.org/10.1016/j.chemosphere.2019.06.224>.
37. Rossmo, K.; Harries, K. The geospatial structure of terrorist cells. *Justice Q.* **2011**, *28*, 221–248. <https://doi.org/10.1080/07418820903426197>.
